# Supplementary material for: High free triiodothyronine, and free-triiodothyronine-to-free-thyroxine ratio are associated with metabolic syndrome in a euthyroid employee population: the Zhejiang Zhenhai study
Source: PubMed Central journal article supplement — Endocr Connect. 2023 Apr 25;12(5):e220424. doi: 10.1530/EC-22-0424 (PMC10160540; doi:10.1530/ec-22-0424), 2023-04-25
Supplement: supplementary_table_1.pdf [file supplementary_table_1.pdf]

**Supplementary Table 1.** Definition of thyroid hormones quartiles by gender

| Thyroid hormones | Quartiles     |               |               |               |
|------------------|---------------|---------------|---------------|---------------|
|                  | Quartile 1    | Quartile 2    | Quartile 3    | Quartile 4    |
| <b>Males</b>     |               |               |               |               |
| TSH (mU/L)       | 0.31-1.15     | 1.16-1.58     | 1.59-2.14     | 2.15-4.67     |
| FT3 (pmol/L)     | 4.00-4.92     | 4.93-5.25     | 5.26-5.60     | 5.61-7.99     |
| FT4 (pmol/L)     | 9.00-10.46    | 10.47-11.31   | 11.32-12.27   | 12.28-27.11   |
| FT3/FT4          | 0.2187-0.4199 | 0.4200-0.4640 | 0.4641-0.5096 | 0.5097-0.8578 |
| <b>Females</b>   |               |               |               |               |
| TSH (mU/L)       | 0.34-1.31     | 1.32-1.83     | 1.84-2.44     | 2.45-4.69     |
| FT3 (pmol/L)     | 4.00-4.63     | 4.64-4.98     | 4.99-5.33     | 5.34-7.44     |
| FT4 (pmol/L)     | 9.00-10.39    | 10.40-11.12   | 11.13-11.98   | 12.99-18.98   |
| FT3/FT4          | 0.2343-0.4066 | 0.4067-0.4479 | 0.4480-0.4899 | 0.4900-0.7265 |
